# Supplementary material for: Acquired multiple mutations ALK I1171N, L1196M and G1202R mediate lorlatinib resistance in EML4-ALK-rearranged malignant pleural mesothelioma: a case report
Source: PubMed Central journal article supplement — Ther Adv Respir Dis. 2020 Jun 29;14:1753466620935770. doi: 10.1177/1753466620935770 (PMC7328355; doi:10.1177/1753466620935770), 2020-06-29
Supplement: Reviewer_2_v.2.pdf [file Reviewer_2_v.2.pdf]

Reviewer 2 v.2

Comments to the Author

Thank you for accepting the suggestions. Great work.
